# Supplementary material for: Effect of experimental hookworm infection on insulin resistance in people at risk of type 2 diabetes
Source: Springer Nature journal article supplement (doi:10.1038/s41467-023-40263-4), 2023-07-26
Supplement: MOESM1 [file 41467_2023_40263_MOESM1_ESM.pdf]

Effect of experimental hookworm infection on insulin resistance in people at risk of Type 2 Diabetes: Supplementary Information

SUPPLEMENTARY TABLES

Supplementary Table 1. HOMA-IR change effect sizes at each evaluation visit

|           | Kruskal Wallis effect size | L3-20 vs Placebo     | L3-40 vs Placebo     |
|-----------|----------------------------|----------------------|----------------------|
| 6 months  | $\eta^2 = 0.04$            | $r = 0.372$          | $r = 0.235$          |
|           | $d_{Cohen} = 0.42^S$       | $d_{Cohen} = 0.80^L$ | $d_{Cohen} = 0.48^S$ |
| 12 months | $\eta^2 = 0.16$            | $r = 0.556$          | $r = 0.341$          |
|           | $d_{Cohen} = 0.86^L$       | $d_{Cohen} = 1.34^L$ | $d_{Cohen} = 0.73^M$ |
| 18 months | $\eta^2 = 0.23$            | $r = 0.513$          | $r = 0.088$          |
|           | $d_{Cohen} = 1.08^L$       | $d_{Cohen} = 1.19^L$ | $d_{Cohen} = 0.18$   |
| 24 months | $\eta^2 = 0.01$            | $r = 0.409$          | $r = 0.195$          |
|           | $d_{Cohen} = 0.20^S$       | $d_{Cohen} = 0.90^L$ | $d_{Cohen} = 0.40^S$ |

S, small effect size; M, medium effect size; L, large effect size.

**Supplementary Table 2. Absolute values and changes in glycated haemoglobin (HbA1c/IFCC) in each treatment group**

| HbA1C IFCC (mmol/mol), Median and IQR (n) |                |                |         |                |         |               |         |               |         |
|-------------------------------------------|----------------|----------------|---------|----------------|---------|---------------|---------|---------------|---------|
|                                           | baseline       | 6 months       | Δ6 mo.  | 12 months      | Δ12 mo. | 18 months     | Δ18 mo. | 24 months     | Δ24 mo. |
| Placebo                                   | 32             | 34             | +1      | 34             | +2      | 33            | +3      | 35            | +4      |
|                                           | 30-33 (n = 12) | 30-36 (n = 12) | 0 to 3  | 30-37 (n = 9)  | 0 to 4  | 30-36 (n = 8) | 0 to 4  | 33-37 (n = 6) | 1 to 5  |
| L3-20                                     | 33             | 32             | 0       | 32             | 0       | 33            | +1      | 33            | +2      |
|                                           | 31-35 (n = 13) | 30-34 (n = 11) | -1 to 1 | 31-35 (n = 11) | -1 to 1 | 32-36 (n = 8) | 0 to 2  | 32-37 (n = 7) | 1 to 4  |
| L3-40                                     | 32             | 31             | +1      | 33             | +3      | 34 #          | +4      | 32            | +2      |
|                                           | 29-34 (n = 11) | 30-35 (n = 11) | 0 to 3  | 32-35 (n = 10) | 1 to 4  | 33-37 (n = 8) | 2 to 7  | 31-37 (n = 9) | 2 to 5  |

**Bolded data indicate presence of significantly different values, # Significantly different to baseline.**

**Supplementary Table 3. Absolute values and changes in serum cholesterol, high-density lipoprotein (HDL) and cholesterol/HDL ratio in each treatment group**

| Total cholesterol (mmol/L), Median and IQR (n)  |                  |                  |              |                    |              |                  |              |                  |             |
|-------------------------------------------------|------------------|------------------|--------------|--------------------|--------------|------------------|--------------|------------------|-------------|
|                                                 | baseline         | 6 months         | Δ6 mo.       | 12 months          | Δ12 mo.      | 18 months        | Δ18 mo.      | 24 months        | Δ24 mo.     |
| Placebo                                         | 5.4              | 4.9              | -0.4         | 4.8                | -0.4         | 4.9              | -0.6         | 5.0              | -0.2        |
|                                                 | 4.9-6.3 (n = 12) | 4.4-6.0 (n = 12) | -0.7 to 0.0  | 4.4-5.4 (n = 9)    | -0.6 to -0.1 | 4.3-5.8 (n = 8)  | -1.1 to -0.1 | 4.5-5.3 (n = 6)  | -0.6 to 0.1 |
| L3-20                                           | 5.2              | 5.1              | -0.3         | 5.0                | -0.2         | 5.1              | -0.2         | 4.9              | -0.2        |
|                                                 | 4.6-6.3 (n = 13) | 3.9-5.9 (n = 12) | -0.6 to -0.2 | 4.2-5.6 (n = 11)   | -0.7 to 0.5  | 4.5-5.7 (n = 10) | -0.4 to 0.4  | 3.9-6.8 (n = 18) | -0.5 to 0.6 |
| L3-40                                           | 5.4              | 6.0              | +0.7         | 5.6                | +0.2         | 5.7              | +0.4 *       | 5.3              | -0.1        |
|                                                 | 4.9-5.5 (n = 11) | 4.9-6.3 (n = 11) | -0.2 to 0.9  | 4.8-5.7 (n = 10)   | -0.2 to 0.3  | 4.6-6.1 (n = 8)  | -0.2 to 0.6  | 4.3-5.8 (n = 9)  | -0.8 to 0.6 |
| HDL (mmol/L), Median and IQR (n)                |                  |                  |              |                    |              |                  |              |                  |             |
| Placebo                                         | 1.2              | 1.1              | -0.1         | 1.2                | 0.0          | 1.2              | -0.1         | 1.2              | 0.0         |
|                                                 | 1.1-1.4 (n = 12) | 1.0-1.3 (n = 12) | -0.1 to 0.0  | 1.1-1.3 (n = 9)    | 0.0 to 0.1   | 1.1-1.6 (n = 8)  | -0.2 to 0.2  | 1.0-1.7 (n = 6)  | -0.3 to 0.2 |
| L3-20                                           | 1.2              | 1.3              | -0.1         | 1.1                | 0.0          | 1.2              | -0.2         | 1.1              | +0.1        |
|                                                 | 1.0-1.5 (n = 13) | 1.0-1.4 (n = 12) | -0.2 to -0.1 | 1.0-1.4 (n = 11)   | -0.1 to 0.0  | 1.0-1.3 (n = 10) | -0.2 to 0.0  | 1.0-1.7 (n = 8)  | -0.1 to 0.2 |
| L3-40                                           | 1.3              | 1.3              | 0.0          | 1.3                | 0.0          | 1.2              | -0.1         | 1.1              | -0.1        |
|                                                 | 1.1-1.5 (n = 11) | 1.1-1.5 (n = 11) | -0.2 to 0.2  | 1.1-1.3 (n = 10)   | -0.1 to 0.1  | 1.1-1.3 (n = 8)  | -0.2 to -0.1 | 1.0-1.4 (n = 9)  | -0.3 to 0.0 |
| Total cholesterol/HDL ratio, Median and IQR (n) |                  |                  |              |                    |              |                  |              |                  |             |
| Placebo                                         | 4.4              | 4.0              | -0.1         | 4.0                | -0.4         | 3.9              | -0.2         | 3.9              | +0.1        |
|                                                 | 3.8-5.2 (n = 12) | 3.8-4.9 (n = 12) | -0.3 to 0.3  | 3.5 to 4.3 (n = 9) | -0.6 to -0.2 | 3.3-4.6 (n = 8)  | -0.7 to 0.3  | 3.3-5.1 (n = 6)  | -0.6 to 0.6 |
| L3-20                                           | 4.1              | 4.2              | +0.2         | 4.2                | -0.1         | 4.3              | +0.3         | 4.2              | -0.2        |
|                                                 | 3.8-4.9 (n = 13) | 3.7-4.9 (n = 12) | 0.0 to 0.3   | 3.7-5.3 (n = 11)   | -0.2 to 0.5  | 3.6-5.6 (n = 10) | -0.3 to 1.1  | 3.3-5.0 (n = 8)  | -0.6 to 0.4 |
| L3-40                                           | 4.0              | 4.4              | +0.5         | 4.5                | +0.1         | 4.8              | +0.5         | 4.3              | +0.2        |
|                                                 | 3.7-4.9 (n = 11) | 4.0-4.7 (n = 11) | -0.2 to 0.8  | 3.9-5.1 (n = 10)   | -0.4 to 0.8  | 4.1-5.0 (n = 8)  | 0.0 to 0.9   | 4.0-5.4 (n = 9)  | -0.1 to 0.7 |

**Bolded data indicate presence of significantly different values, # Significantly different to baseline. \*Significantly different to Placebo.**

**Supplementary Table 4. Absolute values and changes in serum Triglyceride and Low-Density Lipoprotein (LDL) levels in each treatment group**

| Triglycerides (mmol/L), Median and IQR (n) |                         |                         |                     |                                 |                      |                                |                            |                         |
|--------------------------------------------|-------------------------|-------------------------|---------------------|---------------------------------|----------------------|--------------------------------|----------------------------|-------------------------|
|                                            | baseline                | 6 months                | Δ6 mo.              | 12 months                       | Δ12 mo.              | 18 months                      | Δ18 mo.                    | 24 months               |
| <b>Placebo</b>                             | 1.4<br>0.9-2.0 (n = 12) | 1.4<br>1.0-2.0 (n = 12) | +0.2<br>-0.4 to 0.6 | 1.3<br>0.9-1.6 (n = 9)          | 0.0<br>-0.2 to 0.3   | 1.4<br>1.0-1.9 (n = 8)         | +0.3<br>-0.2 to 0.5        | 1.8<br>1.4-2.9 (n = 6)  |
| <b>L3-20</b>                               | 1.3<br>0.9-1.8 (n = 13) | 1.3<br>0.8-1.7 (n = 12) | -0.2<br>-0.3 to 0.2 | 1.2<br>1.0-1.5 (n = 11)         | -0.1<br>-0.4 to 0.2  | 1.4<br>0.8-2.5 (n = 10)        | 0.0<br>-0.2 to 0.8         | +0.1<br>0.9-1.9 (n = 8) |
| <b>L3-40</b>                               | 1.4<br>0.8-2.0 (n = 11) | 1.3<br>1.0-2.7 (n = 11) | -0.2<br>-0.4 to 0.9 | 1.8<br>1.0-2.6 (n = 10)         | +0.1<br>-0.4 to 0.6  | 1.7<br>1.1-1.9 (n = 8)         | -0.1<br>-0.2 to 0.7        | +0.1<br>0.9-2.1 (n = 9) |
| LDL (mmol/L), Median and IQR (n)           |                         |                         |                     |                                 |                      |                                |                            |                         |
| <b>Placebo</b>                             | 3.5<br>3.0-4.4 (n = 12) | 3.1<br>2.6-3.9 (n = 12) | -0.2<br>-0.7 to 0.0 | <b>2.9 #</b><br>2.6-3.4 (n = 9) | -0.3<br>-0.8 to -0.1 | <b>2.9#</b><br>2.5-3.5 (n = 8) | -0.6<br>-0.8 to -0.3       | 2.7<br>2.6-3.2 (n = 6)  |
| <b>L3-20</b>                               | 3.3<br>2.9-4.3 (n = 13) | 3.4<br>2.5-3.8 (n = 12) | -0.4<br>-0.6 to 0.0 | 3.2<br>2.7-3.7 (n = 11)         | -0.1<br>-0.6 to 0.6  | 3.1<br>2.6-3.9 (n = 10)        | -0.3<br>-0.5 to 0.5        | -0.2<br>2.1-4.1 (n = 8) |
| <b>L3-40</b>                               | 3.4<br>2.6-3.6 (n = 11) | 3.4<br>3.0-4.0 (n = 11) | +0.3<br>-0.3 to 1.3 | 3.2<br>3.0-3.8 (n = 10)         | +0.2<br>-0.3 to 0.4  | 3.8<br>2.9-4.0 (n = 8)         | <b>+0.5*</b><br>0.0 to 0.6 | +0.1<br>2.7-3.7 (n = 9) |

**Bolded data indicate presence of significantly different values, # Significantly different to baseline. \*Significantly different to Placebo**

## SUPPLEMENTARY FIGURES AND LEGENDS

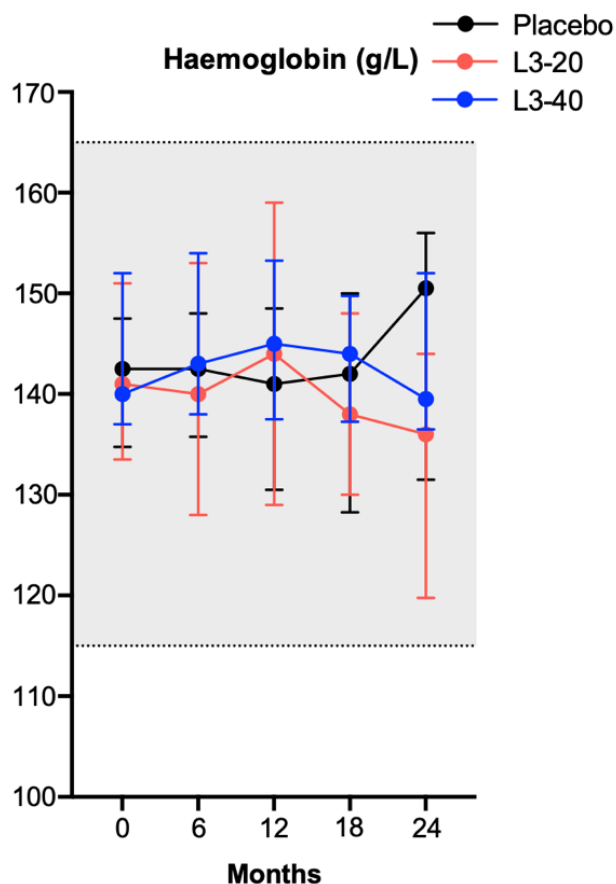

**Supplementary Figure 1. Hookworm infection was not associated with anaemia.** Blood hemoglobin concentration at each evaluation visit (median and IQR), shaded area indicates combined normal range for males and females. (Sample size for month 0, 6, 12, 18 and 24: Placebo n=12, 12, 9, 8 and 6; L3-20 n=13, 12, 11, 11 and 8; L3-40 n=11, 11, 10, 8 and 8, respectively). Source data are provided as a Source Data File.

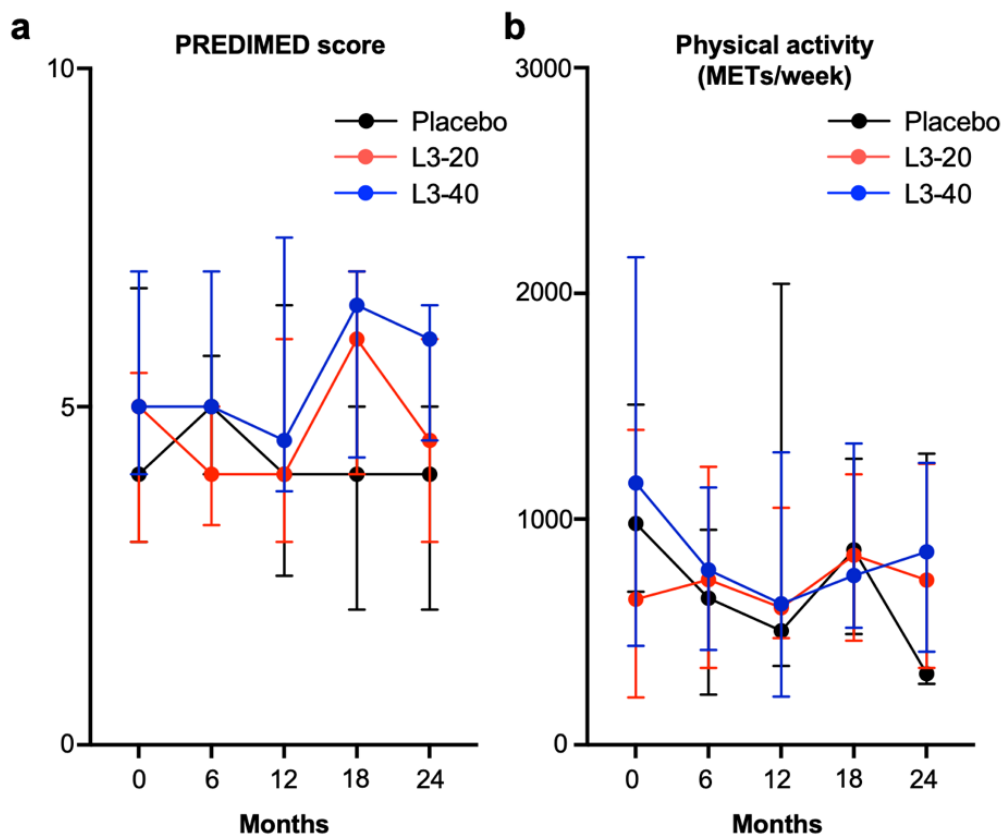

**Supplementary Figure 2. Diet (PREDIMED score) and Physical Activity remained relatively stable in all groups throughout the study. (A)** PREDIMED total scores in each treatment group at each evaluation visit (median and IQR). (Sample size for month 0, 6, 12, 18 and 24: Placebo n=12, 12, 9, 8 and 7; L3-20 n=13, 12, 12, 10 and 6; L3-40 n=11, 11, 10, 8 and 9, respectively). **(B)** Physical activity (Metabolic Equivalents of task, METs) per week assessed at each evaluation visit (median and IQR). (Sample size for month 0, 6, 12, 18 and 24: Placebo n=12, 12, 9, 8 and 7; L3-20 n=13, 12, 11, 10 and 8; L3-40 n=11, 11, 10, 8 and 9, respectively). Source data are provided as a Source Data File.

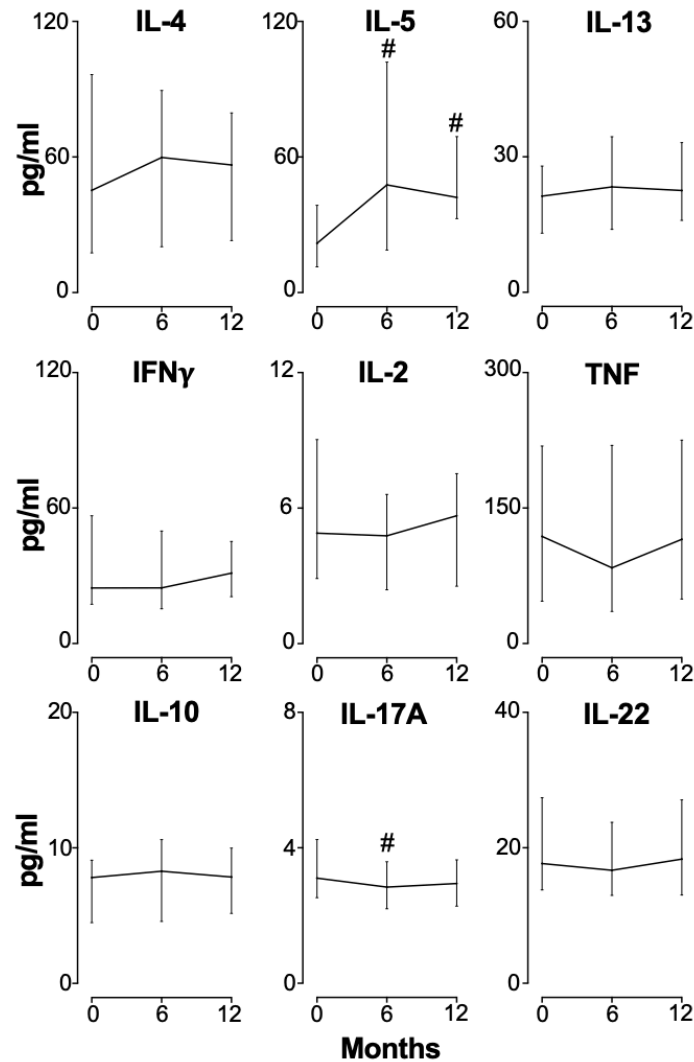

**Supplementary Figure 3. Serum cytokine levels in combined hookworm-treated cohorts.** Serum samples taken from L3-20 and L3-40 participants (n=17) at baseline, 6 months and 12 months were thawed and batch analysed using a multiplex human cytokine panel. Levels of nine different cytokines are depicted as median and IQR. # Significant difference to month 0 baseline value, Friedman's test with Dunn's multiple comparisons. IL-5 p= 0.0001 (6 months) and p= 0.02 (12 months); IL-17A p=0.026 (6 months). Source data are provided as a Source Data File.

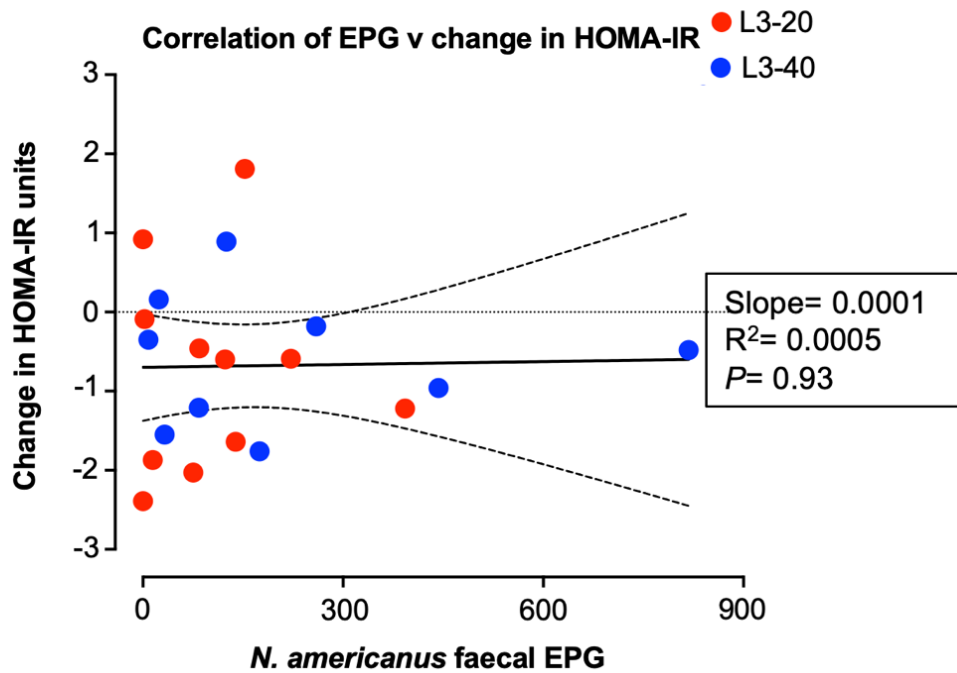

**Supplementary Figure 4. Correlation analysis of hookworm infection intensity and changes in HOMA-IR.** Hookworm eggs per gram (EPG) in faecal samples at 6 months were plotted against change in HOMA-IR from baseline to 6 months for L3-20 and L3-40 hookworm-treated participants. Simple linear regression analysis (solid line, dotted lines represent 95% CI) revealed no significant associations. Source data are provided as a Source Data File.



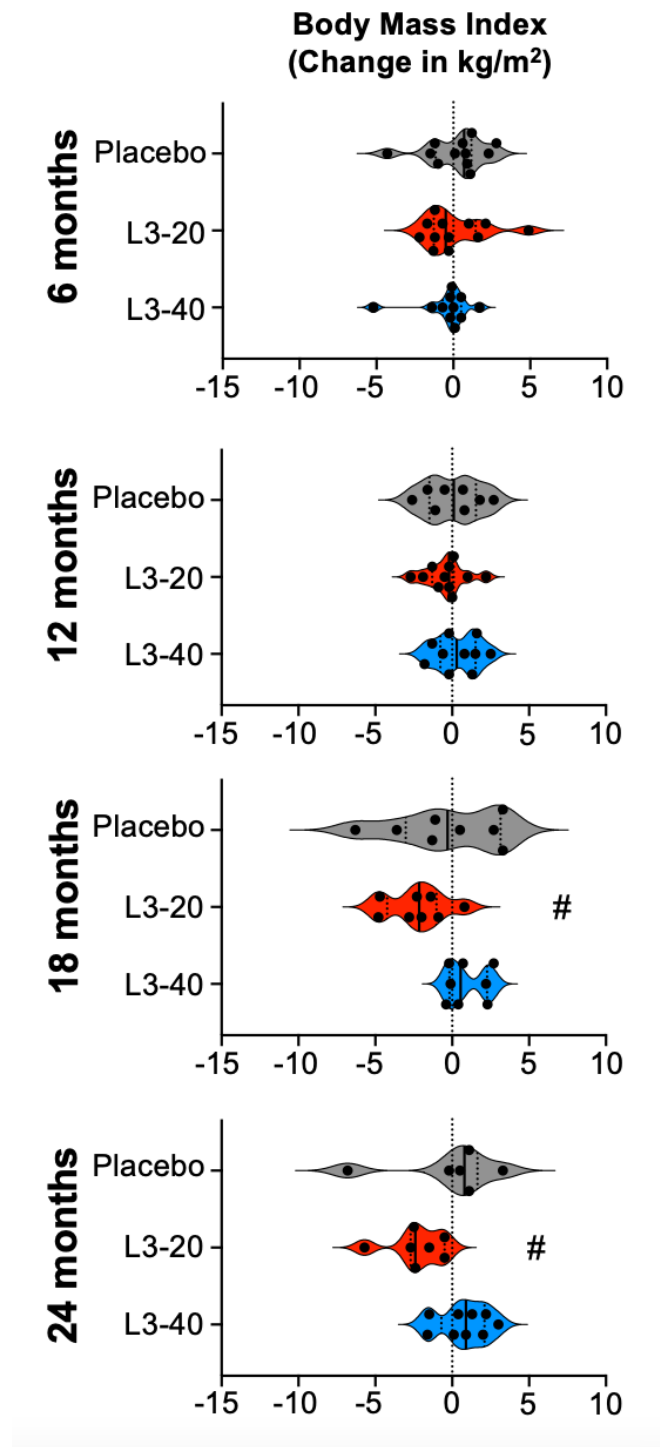

**Supplementary Figure 5. Impact of experimental hookworm infection on body mass index (BMI).** Changes in participant's body mass index (kg/m<sup>2</sup>) from baseline values at each 6-monthly evaluation visit. Violin plots display each individual data point, median and IQR. Dotted vertical line indicates baseline levels (0 change). # Median value significant difference to baseline. Durbin, Skillings-Mack test and Wilcoxon signed-rank test: L3-20 at

18 months  $p=0.016$ , L3-20 at 24 months  $p=0.016$ . Source data are provided as a Source Data File.
